# Supplementary material for: Exploring mental functions utilised by male youth team-based ball-sport athletes within academy programs: a systematic review and meta-aggregation
Source: Front Sports Act Living. 2024 Oct 17;6:1453817. doi: 10.3389/fspor.2024.1453817 (PMC11524844; doi:10.3389/fspor.2024.1453817)
Supplement: Supplementary Table S1 — Excluded studies from full text. [file Table1.xlsx]

## Sheet: File 1. Excluded studies
Author	Year	Title	Reason for exclusion	n =
Burnett, D.	2001	Afterword	Book/ book chapter	6
Cote et al.	2003	From play to practice: a developmental framework for the acquisition of expertise in team sports	Book/ book chapter
Cote, J. & Abernethy, B.	2012	A developmental approach to sport expertise	Book/ book chapter
Toering, T.	2017	Eventual sport performance level: What about the role of type of sport, perception of critical life events, and practice quality?	Book/ book chapter
Dixon et al.	2020	A challenge culture: Reflections on implementing a psychological skills programme in elite youth soccer	Book/ book chapter
Evans et al.	2020	Identifying and delivering a team-based intervention in elite youth soccer: Using personal-disclosure mutual-sharing to enhance team identification, resilience, and coping	Book/ book chapter
Kovac, T.	1997	Giftedness in sports: Some aspects of the relationship of creativity and coping in young football players	Duplicate	18
Vanyperen, N. & Duda, J.	1997	Goal orientation, beliefs about success, and performance improvement among young elite Dutch soccer players	Duplicate
Van Yperen, N.	1998	Being a SportParent: Buffering the effect of your talented child's poor performance on his or her subjective well-being	Duplicate
Weigand, D.& Broadhurst, C.	1998	The relationship among perceived competence, intrinsic motivation, and control perceptions in youth soccer	Duplicate
Baxter-Jones, A. & Maffulli, N.	2003	Parental influence on sport participation in elite young athletes	Duplicate
Schorer et al.	2010	Influence of early environmental constraints on achievement in talented young handball players	Duplicate
Larsen et al.	2012	Psychosocial Skills in a Youth Soccer Academy: A Holistic Ecological Perspective	Duplicate
Miranda et al.	2013	Effects of 10-week soccer training program on anthropometric, psychological, technical skills and specific performance parameters in youth soccer players	Duplicate
Noon et al.	2015	Perceptions of well-being and physical performance in English elite youth footballers across a season	Duplicate
Brenner et al.	2016	Sports specialization and intensive training in young athletes	Duplicate
Unkown author	2016	Psychology; Study Data from University of Bern Update Knowledge of Psychology (Holistic Patterns as an Instrument for Predicting the Performance of Promising Young Soccer Players - A 3-Years Longitudinal Study)	Duplicate
Gonçalves et al.	2017	From Talent to High Performance: The view of coaches, players and club coordinators on the relevant factors in the development of a Basketball player.	Duplicate
Wolff et al.	2019	Trait self-control discriminates between youth football players selected and not selected for the German talent program: A Bayesian analysis. [References]	Duplicate
Bennett et al.	2020	A multifactorial comparison of Australian youth soccer players' performance characteristics	Duplicate
Markati et al.	2019	Psychological and situational determinants of burnout in adolescent athletes.	Duplicate
Barraclough et al.	2023	Examining the psychological characteristics of developing excellence profiles of male English youth soccer players: differences across ages and performance levels	Duplicate
Beavan et al.	2023	Compassion and self-compassion motivation and action levels in a high-performance soccer youth academy	Duplicate
Jordana et al.	2023	Ready for Failure? Irrational Beliefs, Perfectionism and Mental Health in Male Soccer Academy Players	Duplicate
Herring et al.	2006	Psychological issues related to injury in athletes and the team physician: A consensus statement	Grey Literature	3
Anonymous,	2008	Sports Medicine; Findings from C. Harwood and co-researchers advance knowledge in sports medicine	Grey Literature
Epstein, D.	2014	The truth about talent	Grey Literature
Kodym, M.	1973	The influence of sensomotor learning on intellectual efficiency and school marks in pupils with an aptitude for sports	No full text (reports not retrieved)	36
Jackson et al.	1978	Injury prediction in the young athlete: a preliminary report	No full text (reports not retrieved)
Deshaies et al.	1979	Psychobiological profile of individual performance in junior hockey players	No full text (reports not retrieved)
Taylor, P.	1980	Personality differences between high school hockey players differentiated on the basis of ability	No full text (reports not retrieved)
Passer, M.	1982	Participation Motives of Young Athletes As a Function of Competitive Trait Anxiety, Self-Esteem, Ability and Age	No full text (reports not retrieved)
Novotny, L. & Petrak, B.	1983	Characteristics of juniors and schoolboys - ice hockey players.	No full text (reports not retrieved)
Figula, P.	1980	Psychological problems in the selection of boys and girls talented for basketball	No full text (reports not retrieved)
Carlson, R.	1993	The path to the national level in sports in Sweden	No full text (reports not retrieved)
Braathen, E.	1994	Prediction of excellence and discontinuation in different types of sport: the significance of motivation and EMG	No full text (reports not retrieved)
Geschke, F.	1994	Talent development from the perspective of the motivation to the competition	No full text (reports not retrieved)
Watkins et al.,	1994	The relation between self-efficacy and sport performance: evidence from a sample of youth baseball players	No full text (reports not retrieved)
Kovac, T.	1997	Giftedness in sports: some aspects of the relationship of creativity and coping in young football players	No full text (reports not retrieved)
Badenhorst, et al.,	2000	A prediction function for the classification of the soccer abilities of 16-year-old boys in the North West Province	No full text (reports not retrieved)
Richardson, D. & Reilly, T.	2001	Talent identification, detection and development of youth football players - sociological considerations.	No full text (reports not retrieved)
Richardson et al.	2002	Talent characteristics of academy players in an FA Premier League football club: a qualitative psychological perspective. (Abstract)	No full text (reports not retrieved)
Burmann, U.	2004	The effects of sports activities on the self-concept of adolescents	No full text (reports not retrieved)
Harttgen, U. & Milles, D.	2004	Leistungsbereitschaft und Bewaeltigungsressourcen Ueberlegungen zur Talentfoerderung im Fussball. / Readiness to perform and coping resources. Reflections on talent promotion in soccer	No full text (reports not retrieved)
Pfeiffer, M.	2004	Performance diagnostics in the training of youth athletes in handball: a theoretical, mathematical model-based approach to the determination of the performance-relevance of tactical competition characteristics	No full text (reports not retrieved)
Van Rossum, J.	2004	More or less talented: Physical features of young volleyball players	No full text (reports not retrieved)
Liu, Y. & Tian, H	2008	Comprehensive Study on Psychological Features of Chinese Talent Young Basketball Players	No full text (reports not retrieved)
Naul et al.	2008	Talented players need physical and mental challenges	No full text (reports not retrieved)
Scott, A.	2008	Young talent time	No full text (reports not retrieved)
Hartwig, T. & Naughton, G.	2009	Psychological stress and recovery in adolescent rugby union players during competitive seasons	No full text (reports not retrieved)
Tang, Y. & Gu, Y.	2010	Ordinary middle schools in china high-level men's football team's investigation andanalysis	No full text (reports not retrieved)
Väänänen, I. & Kuorikoski, T.	2010	Sports academies: the way to win	No full text (reports not retrieved)
Beckmann, J. & Zier, E.	2011	Adequate stress control in young competitive athletes	No full text (reports not retrieved)
Pazo Haro et al.	2011	The Training of High-Level Competition Football Players from the Perspective of Academy Coordinators	No full text (reports not retrieved)
Chong, A.	2012	Hockey schools evolve as the game continues to change	No full text (reports not retrieved)
Pabst, K.	2013	Where stars are born: Barcelona's academy	No full text (reports not retrieved)
Walter, P.	2013	An exploration of how the discourse within educational neuroscience might inform developmental understanding of decision making in the context of elite academy football	No full text (reports not retrieved)
Mokhtari, I.	2014	Athletes responsibilities and social change	No full text (reports not retrieved)
No Author identified	2015	Sport Psychology; Recent Findings from Umea University Provides New Insights into Sport Psychology (The predictive ability of the talent development environment on youth elite football players' well-being: A person-centered approach)	No full text (reports not retrieved)
Mendes et al.	2016	Differences between imagery ability (external visual, internal visual an kinesthetic) in young soccer players	No full text (reports not retrieved)
Saha et al.	2016	Perceptual and emotional competence predicting symmetry in movement coordination in soccer players	No full text (reports not retrieved)
Raoul et al.	2018	Aptitude physique et psychologique pour la reprise du sport après reconstruction du ligament croisé antérieur du genou : score ACL-RSI et tests fonctionnels	No full text (reports not retrieved)
Kusner, S. & Harris, L.	2022	The Relationship Between Sport Specialization and Coping Mechanisms in Adolescent Athletes	No full text (reports not retrieved)
Boardley, I. & Kavussanu, M.	2009	The influence of social variables and moral disengagement on prosocial and antisocial behaviours in field hockey and netball	No male data	15
Bortoli et al.	2011	Competence, achievement goals, motivational climate, and pleasant psychobiosocial states in youth sport	No male data
Isoard-Gautheur et al.	2013	How to achieve in elite training centers without burning out? An achievement goal theory perspective	No male data
MacNamara, A. & Collins, D.	2013	Do mental skills make champions? Examining the discriminant function of the psychological characteristics of developing excellence questionnaire	No male data
Moreno-Murcia et al.	2014	Conceptions of ability and self-determined motivation in young Spanish athletes	No male data
Cronin, L. & Allen, J.	2015	Developmental experiences and well-being in sport: The importance of the coaching climate	No male data
Honer, O. & Feichtinger, P.	2016	Psychological talent predictors in early adolescence and their empirical relationship with current and future performance in soccer	No male data
De Bosscher, V. & De Rycke, J.	2017	Talent development programmes: A retrospective analysis of the age and support services for talented athletes in 15 nations	No male data
Alexandra et al.	2018	Psychological and situational determinants of burnout in adolescent athletes	No male data
Bjørndal et al.	2018	Successful and unsuccessful transitions to the elite level: The youth national team pathways in Norwegian handball	No male data
Curran, T.	2018	Parental conditional regard and the development of perfectionism in adolescent athletes: The mediating role of competence contingent self-worth	No male data
Gesbert et al.	2018	Validation of a French Version of the Psychological Characteristics of Developing Excellence Questionnaire (MacNamara & Collins, ): A Situated Approach to Talent Development	No male data
Kiewra, K.& Witte, A.	2018	Prodigies of the Prairie: The talent development stories of four elite Nebraska youth performers	No male data
Li, et al.	2019	Relationships between talent development environments and mental toughness: The role of basic psychological need satisfaction	No male data
Gesbert et al.	2021	Reviewing the role of the environment in the talent development of a professional soccer club	No male data
Baxter-Jones, A. & Maffulli, N.	2003	Parental influence on sport participation in elite young athletes	No pyschometric attribute	9
Kannekens et al.	2011	Positioning and deciding: Key factors for talent development in soccer	No pyschometric attribute
Sharp et al.,	2013	A qualitative evaluation of the effectiveness of a mental skills training program for youth athletes	No pyschometric attribute
Diment, D.	2014	Mental Skills Training in Soccer: A Drill-based Approach	No pyschometric attribute
Larsen et al.	2014	Preparing footballers for the next step: An intervention program from an ecological perspective	No pyschometric attribute
Goncalves et al.	2017	From talent to high performance: The view of coaches, players and club coordinators on the relevant factors in the development of a basketball player	No pyschometric attribute
Karageorghis et al.	2018	A grounded theory of music use in the psychological preparation of academy soccer players	No pyschometric attribute
Doncaster et al.	2020	Appreciating Factors Beyond the Physical in Talent Identification and Development: Insights From the FC Barcelona Sporting Model	No pyschometric attribute
Scharfen, H., & Memmert, D.	2019	The Relationship Between Cognitive Functions and Sport-Specific Motor Skills in Elite Youth Soccer Players	No pyschometric attribute
Kioumourtzoglou et al.	2000	Ability profile of the elite volleyball player	No pyschometric tool	49
Falk et al.	2004	Talent identification and early development of elite water-polo players: a 2-year follow-up study	No pyschometric tool
Holt, N. & Dunn, J.	2004	Toward a Grounded Theory of the Psychosocial Competencies and Environmental Conditions Associated with Soccer Success	No pyschometric tool
Holt, N. & Morley, D.	2004	Gender Differences in Psychosocial Factors Associated With Athletic Success During Childhood	No pyschometric tool
Holt, N. & Mitchell, T.	2006	Talent development in English professional soccer	No pyschometric tool
Quintana et al.	2007	Perceptual visual skills in young highly skilled basketball players	No pyschometric tool
Vaeyens et al.	2007	The Effects of Task Constraints on Visual Search Behavior and Decision-Making Skill in Youth Soccer Players	No pyschometric tool
Platts, C. & Smith, A.	2009	The education, rights and welfare of young people in professional football in England: some implications of the White Paper on Sport	No pyschometric tool
Reeves et al.	2009	Stressors and Coping Strategies among Early and Middle Adolescent Premier League Academy Soccer Players: Differences According to Age	No pyschometric tool
Elferink-Gemser et al.	2010	Knowing what to do and doing it: Differences in self-assessed tactical skills of regional, sub-elite, and elite youth field hockey players	No pyschometric tool
Holland et al.	2010	Mental qualities and employed mental techniques of young elite team sport athletes	No pyschometric tool
Waldron, M., & Worsfold, P.	2010	Differences in the Game Specific Skills of Elite and Sub-Elite Youth Football Players: Implications for Talent Identification	No pyschometric tool
Christensen et al.	2011	Situated learning in youth elite football: A Danish case study among talented male under-18 football players	No pyschometric tool
Reeves et al.	2011	The effects of a coping intervention on coping self-efficacy, coping effectiveness, and subjective performance among adolescent soccer players	No pyschometric tool
Reeves et al.	2011	Longitudinal analyses of stressors perceived control, coping and coping effectiveness among early and middle adolescent soccer players	No pyschometric tool
Holt et al.	2012	Effects of peer-assessed feedback, goal setting and a group contingency on performance and learning by 10–12-year-old academy soccer players	No pyschometric tool
Larsen et al.	2012	Psychosocial Skills in a Youth Soccer Academy: A Holistic Ecological Perspective	No pyschometric tool
Ljach et al.	2012	Toward effective forecast of professionally important sensorimotor cognitive abilities of young soccer players	No pyschometric tool
Roca et al.	2012	Developmental activities and the acquisition of superior anticipation and decision making in soccer players	No pyschometric tool
Williams et al.	2012	Perceptual-cognitive expertise, practice history profiles and recall performance in soccer	No pyschometric tool
Reeves, M. & Roberts, S.	2013	Perceptions of performance analysis in elite youth football	No pyschometric tool
Cook et al.	2014	'What it takes': perceptions of mental toughness and its development in an English Premier League Soccer Academy	No pyschometric tool
Diogo, F. & Goncalves, C.	2014	The path to expertise in youth sport: using a retrospective interview in three different competitive contexts	No pyschometric tool
Litkowycz et al.	2014	Withdrawal from sport training of young talented basketball players and its impact on selection in sport	No pyschometric tool
McCarthy, N. & Collins, D.	2014	Initial identification & selection bias versus the eventual confirmation of talent: evidence for the benefits of a rocky road?	No pyschometric tool
Phillips et al.	2014	Acquisition of expertise in cricket fast bowling: Perceptions of expert players and coaches	No pyschometric tool
Hardcastle et al.	2015	Exploring the perceived effectiveness of a life skills development program for high-performance athletes	No pyschometric tool
Forsman et al.	2016	Development and validation of the Perceived Game-Specific Soccer Competence Scale	No pyschometric tool
Foster et al.	2016	Delivery of psychological skills training to youngsters	No pyschometric tool
McCarthy et al.	2016	Start hard, finish better: further evidence for the reversal of the RAE advantage	No pyschometric tool
Noon, M.	2016	The utility of well-being and physical performance assessments in managing the development of elite youth football players	No pyschometric tool
Verburgh et al.	2016	The key to success in elite athletes? Explicit and implicit motor learning in youth elite and non-elite soccer players	No pyschometric tool
Kilger, M.; Jonsson, R.	2017	Talent production in interaction: Performance appraisal interviews in talent selection camps	No pyschometric tool
Li et al.	2017	The roles of the talent development environment on athlete burnout: A qualitative study	No pyschometric tool
Chin Wei et al.	2018	The boy behind the bravado: Player advanced safety and support in a professional football academy setting	No pyschometric tool
Elliott et al.	2018	The experiences of being a talented youth athlete: Lessons for parents	No pyschometric tool
Ryan et al.	2018	Developing world-class soccer players: An example of the academy physical development program from an english premier league team	No pyschometric tool
Evans et al.	2019	Athlete and Practitioner Insights Regarding a Novel Coping-Oriented Personal-Disclosure Mutual-Sharing Intervention in Youth Soccer	No pyschometric tool
Guenter et al.	2019	Talent Identification in Youth Ice Hockey: Exploring "Intangible" Player Characteristics	No pyschometric tool
Kiss, B. & Balogh, L.	2019	A study of key cognitive skills in handball using the Vienna test system	No pyschometric tool
Roberts et al.	2019	Efficacy of using non-linear pedagogy to support attacking players’ individual learning objectives in elite-youth football: A randomised cross-over trial	No pyschometric tool
Salter et al.	2020	The moderating impact of maturation on acute neuromuscular and psycho-physiological responses to simulated soccer activity in academy soccer players	No pyschometric tool
Dugdale et al.	2021	Selected, Deselected, and Reselected: A Case Study Analysis of Attributes Associated With Player Reselection Following Closure of a Youth Soccer Academy	No pyschometric tool
Höner et al.	2021	Nationwide Subjective and Objective Assessments of Potential Talent Predictors in Elite Youth Soccer: An Investigation of Prognostic Validity in a Prospective Study	No pyschometric tool
Mills et al.	2022	Introducing an integrated model of talent development: From research to practice	No pyschometric tool
Paulina et al.	2022	Competence model (MCJF) for the evaluation of soccer players in youth categories of Sevilla F.C	No pyschometric tool
Merkel et al.	2021	Optimism and positivity biases in performance appraisal ratings: Empirical evidence from professional soccer	No pyschometric tool
Blake et al.	2023	Designing elite football programmes that produce quality athletes and future ready adults: incorporating social emotional learning and career development	No pyschometric tool
Papastaikoudis et al.	2023	Blank canvas or under construction? Examining the pre-academy experiences of young developing professional team sports athletes	No pyschometric tool
Daus et al.	1989	Predicting success in football. / La prediction du succes au football	No youth data	38
Gordon, S.	1990	A Mental Skills Training Program for the Western Australian State Cricket Team	No youth data
Lidor, R. & Lavyan, N.	2002	A retrospective picture of early sport experiences among elite and near-elite Israeli athletes: Developmental and psychological perspectives	No youth data
Galambos et al.	2005	Psychological predictors of injury among elite athletes	No youth data
Saenz-Lopez et al.	2005	Multifactor characteristics in the process of development of the male expert basketball player in Spain	No youth data
Sugiyama, T. & Inomata, K.	2005	Qualitative examination of flow experience among top Japanese athletes	No youth data
Coetzee et al.	2006	Sport psychological skills that distinguish successful from less successful soccer teams	No youth data
Memmert, D.	2006	Developing creative thinking in a gifted sport enrichment program and the crucial role of attention processes	No youth data
Smith, M., & Cushion, C.	2006	An investigation of the in-game behaviours of professional, top-level youth soccer coaches	No youth data
Harwood, C.	2008	Developmental Consulting in a Professional Football Academy: The 5Cs Coaching Efficacy Program	No youth data
Maxwell, J. & Visek, A.	2009	Unsanctioned aggression in rugby union: Relationships among aggressiveness, anger, athletic identity, and professionalization	No youth data
Macnamara, A. & Collins, D.	2011	Development and initial validation of the Psychological Characteristics of Developing Excellence Questionnaire	No youth data
Triggs et al.	2011	Metaphorical Use of Song Lyrics within Sport Psychology Practice: Targeting the Transition within a Premier League Football Youth Academy	No youth data
Mills et al.	2012	Identifying factors perceived to influence the development of elite youth football academy players	No youth data
Toering et al.	2012	Effective learning among elite football players: The development of a football-specific self-regulated learning questionnaire	No youth data
Moesch et al.	2013	Making it to the top in team sports: Start later, intensify, and be determined!	No youth data
Clarke, N. & Harwood, C.	2014	Parenting experiences in elite youth football: A phenomenological study	No youth data
Henriksen et al.	2014	Sport psychology interventions with young athletes: The perspective of the sport psychology practitioner	No youth data
Mills et al.	2014	Toward an Understanding of Optimal Development Environments Within Elite English Soccer Academies	No youth data
Hill et al.	2016	Examining the role of mental health and clinical issues within talent development	No youth data
Devin, H. & Farbod, D.	2017	The mediating role of coaches’ sense of humor in relationship of group emotional intelligence with teamwork effectiveness in collegiate athletes	No youth data
Jokuschies et al.	2017	Systematizing coaches' 'eye for talent': Player assessments based on expert coaches' subjective talent criteria in top-level youth soccer	No youth data
Larkin, P. & O'Connor, D.	2017	Talent identification and recruitment in youth soccer: Recruiter’s perceptions of the key attributes for player recruitment	No youth data
Morris et al.	2017	From youth team to first team: An investigation into the transition experiences of young professional athletes in soccer	No youth data
Nicholls et al.,	2017	Perceptions of the coach-athlete relationship predict the attainment of mastery achievement goals six months later: A two-wave longitudinal study among F. A. Premier League Academy soccer players	No youth data
Rothwell et al.	2017	Development of expertise in elite and sub-elite British rugby league players: A comparison of practice experiences	No youth data
Varga et al.	2018	Declared Pedagogical Values of Coaches at Hungarian Football Academies	No youth data
Verner-Filion, J. & Vallerand, R.	2018	A longitudinal examination of elite youth soccer players: The role of passion and basic need satisfaction in athletes' optimal functioning	No youth data
Mossman, G. & Cronin, L.	2019	Life skills development and enjoyment in youth soccer: The importance of parental behaviours	No youth data
Roberts et al.	2019	Establishing consensus of position-specific predictors for elite youth soccer in England	No youth data
Silva et al.	2019	Exploring the importance of coaches in the development of the sports career in Handball. The perception of athletes from higher and lower levels of success	No youth data
Moore et al.	2021	Redesigning a youth soccer program: Holistic development of athletes	No youth data
Kelly et al.	2022	A Multidisciplinary Investigation into the Talent Development Processes at an English Football Academy: A Machine Learning Approach	No youth data
Nicholls et al.,	2022	Multi-wave analyses of coping, athlete burnout, and well-being among F. A. Premier League academy players	No youth data
Smith et al.	2018	Perfectionism, Burnout, and Depression in Youth Soccer Players: A Longitudinal Study	No youth data
Reverberi et al.,	2021	The Self-Regulation of Learning - Self-Report Scale for Sport Practice: Validation of an Italian Version for Football	No youth data
Erikstad et al.	2021	An examination of the relationship between coaches transformational leadership and athletes personal and group characteristics in elite youth soccer	No youth data
Dimundo et al.	2022	A Multidisciplinary Investigation into the Talent Development Processes in an English Premiership Rugby Union Academy: A Preliminary Study through an Ecological Lens	No youth data
Smith, T.	1983	Competition trait anxiety in youth sport: differences according to age, sex, race and playing status	Not Academy based	93
Watkins, B. & Montgomery, A.	1989	Conceptions of athletic excellence among children and adolescents	Not Academy based
Hopper et al.	1991	Self-concept and skill development in youth soccer players	Not Academy based
Braathen, E. & Svebak, S	1992	Motivational differences among talented teenage athletes: The significance of gender, type of sport and level of excellence	Not Academy based
Hom et al.	1993	Correlates of Goal Orientations Among Young Athletes	Not Academy based
Ebbeck, V. & Becker, S.	1994	Psychosocial predictors of goal orientations in youth soccer	Not Academy based
Losier, G. & Vallerand, R.	1994	The temporal relationship between perceived competence and self-determined motivation	Not Academy based
Derri et al.	1998	Assessment of abilities in basketball: A preliminary study	Not Academy based
Goudas, M.	1998	Motivational climate and intrinsic motivation of young basketball players	Not Academy based
Hellandsig, E.	1998	Motivational predictors of high performance and discontinuation in different types of sports among talented teenage athletes	Not Academy based
Kovac, T	1998	Effects of creativity training in young soccer talents	Not Academy based
Van Yperen, N.	1998	Being a SportParent: buffering the effect of your talented child's poor performance on his or her subjective well-being.	Not Academy based
Weigand, D. & Broadhurst, C.	1998	The relationship among perceived competence, intrinsic motivation, and control perceptions in youth soccer	Not Academy based
Liukkonen, J. & Leskinen, E.	1999	The reliability and validity of scores from the children's version of the Perception of Success Questionnaire	Not Academy based
Ryska, T. & Yin, Z.	1999	Dispositional and situational goal orientations as discriminators among recreational and competitive league athletes	Not Academy based
Van-Yperen, N. & Duda, J.	1999	Goal orientations, beliefs about success, and performance improvement among young elite Dutch soccer players	Not Academy based
Elferink-Gemser et al.	2004	Development of the Tactical Skills Inventory For Sports	Not Academy based
Kontos, A	2004	Perceived Risk, Risk Taking, Estimation of Ability and Injury Among Adolescent Sport Participants	Not Academy based
Alfermann et al.	2005	Perceived Leadership Behavior and Motivational Climate as Antecedents of Adolescent Athletes' Skill Development	Not Academy based
Ommundsen et al.	2005	Peer relationships in adolescent competitive soccer: associations to perceived motivational climate, achievement goals and perfectionism	Not Academy based
Cassidy, C. & Conroy, D.	2006	Children's self-esteem related to school- and sport-specific perceptions of self and others	Not Academy based
Lamont-Mills, A. & Christensen, S	2006	Athletic identity and its relationship to sport participation levels	Not Academy based
McMorris et al.	2006	Cognitive Development and Performance of 11-, 13-, and 15-Year Olds on a Soccer-Specific Test of Decision Making	Not Academy based
Superlak, E.	2006	The structure of volleyball playing dispositions in players aged 14-15, candidates for the Polish National Team	Not Academy based
Li, C. & Chi, L.	2007	Prediction of goal orientation and perceived competence on intensity and direction of precompetitive anxiety among adolescent handball players	Not Academy based
McArdle, S. & Duda, J.	2008	Exploring the etiology of perfectionism and perceptions of self-worth in young athletes	Not Academy based
Roberts et al.	2008	Movement imagery ability: development and assessment of a revised version of the vividness of movement imagery questionnaire	Not Academy based
Christensen, M.	2009	"An eye for talent": Talent identification and the "practical sense" of top-level soccer coaches	Not Academy based
Figueiredo et al.	2009	Characteristics of youth soccer players who drop out, persist or move up	Not Academy based
Figueiredo et al.	2009	Youth soccer players, 11-14 years: maturity, size, function, skill and goal orientation	Not Academy based
Findlay, L. & Bowker, A.	2009	The link between competitive sport participation and self-concept in early adolescence: A consideration of gender and sport orientation	Not Academy based
Greenwood, P. & Kanters, M.	2009	Talented male athletes: Exemplary character or questionable characters?	Not Academy based
Gucciardi et al.	2009	Evaluation of a mental toughness training program for youth-aged Australian footballers: I. A quantitative analysis	Not Academy based
Coelho et al.	2010	Discrimination of u-14 soccer players by level and position	Not Academy based
Holgado Tello et al.	2010	A structural model of goal orientation in sports: personal and contextual variables	Not Academy based
Jonker et al.	2010	Differences in self-regulatory skills among talented athletes: the significance of competitive level and type of sport	Not Academy based
McCarthy et al.	2010	What do young athletes implicitly understand about psychological skills?	Not Academy based
Ommundsen et al.	2010	Motivational climate, need satisfaction, regulation of motivation and subjective vitality: A study of young soccer players	Not Academy based
Cupples, B. & O'Connor, D.	2011	The development of position-specific performance indicators in elite youth rugby league: A coach's perspective	Not Academy based
Hill, A.& Appleton, P.	2011	The predictive ability of the frequency of perfectionistic cognitions, self-oriented perfectionism, and socially prescribed perfectionism in relation to symptoms of burnout in youth rugby players	Not Academy based
Joesaar, H. & Hein, V.	2011	Psychosocial determinants of young athletes' continued participation over time	Not Academy based
Jones et al.	2011	Exploring the '5Cs' of positive youth development in sport	Not Academy based
Rikberg, A. & Raudsepp, L.	2011	Multidimensional performance characteristics in talented male youth volleyball players	Not Academy based
Stelter et al.	2011	Narrative-collaborative group coaching develops social capital-A randomised control trial and further implications of the social impact of the intervention	Not Academy based
Anderson-Butcher et al.	2013	Exploring the impact of a summer sport-based youth development program	Not Academy based
Kruger et al.	2013	Sport psychological characteristics of talented 13-year old adolescents	Not Academy based
Malete et al.	2013	Influence of coaching efficacy and coaching competency on athlete-level moral variables in Botswana youth soccer	Not Academy based
Miranda et al.	2013	Effects of 10-week soccer training program on anthropometric, psychological, technical skills and specific performance parameters in youth soccer players	Not Academy based
Atkins, M	2014	The peer created motivational climate in youth sport and its relationship to psychological outcomes and intention to continue in sport among male adolescents	Not Academy based
Goncalves et al.	2014	A multilevel approach to the path to expertise in three different competitive settings	Not Academy based
Balakova et al.	2015	Selected Cognitive Abilities in Elite Youth Soccer Players	Not Academy based
Orosz, R. & Mezo, F.	2015	Psychological Factors in the Development of Football-Talent from the Perspective of an Integrative Sport-Talent Model	Not Academy based
Rottensteiner et al.	2015	The interplay of autonomous and controlled motivation in youth team sports	Not Academy based
Rottensteiner et al.	2015	Youth athletes' motivation, perceived competence, and persistence in organized team sports	Not Academy based
Forsman et al.	2016	The role of sport-specific play and practice during childhood in the development of adolescent Finnish team sport athletes	Not Academy based
Jung et. al.,	2016	Team Commitment as a Mediator Between Self-Esteem and Team Climate as Perceived by Korean Youth Soccer Players	Not Academy based
Mladenović et al.	2016	Differences in personality features and achievement motivation in child athletes and non athletes	Not Academy based
Sindik, J. & Čuk, A.	2016	Psychological characteristics and traits in male handball players - optimism, athlete engagement and mental energy	Not Academy based
Ong, N. & Griva, K.	2017	The effect of mental skills training on competitive anxiety in schoolboy rugby players	Not Academy based
PauŠEk et al.	2017	Psychological sporting talents and indicators of mental health at young male and female handball players	Not Academy based
Te Wierike et al.	2018	The importance and development of ball control and (self-reported) self-regulatory skills in basketball players for different positions	Not Academy based
Zambrin Vignadelli et al.	2018	Motives for sports practice in young soccer and volleyball athletes.	Not Academy based
Zanatta et al.	2018	Individual Motivations, Motivational Climate, Enjoyment, and Physical Competence Perceptions in Finnish Team Sport Athletes: A Prospective and Retrospective Study	Not Academy based
Chiwaridzo et al.	2019	Coaches' perceptions on qualities defining good adolescent rugby players and are important for player recruitment in talent identification programs: the SCRuM project	Not Academy based
Markati et al.	2019	Psychological and situational determinants of burnout in adolescent athletes	Not Academy based
Milavic et al.	2019	Development and factorial validity of the Psychological Skills Inventory for Sports, Youth Version - Short Form: Assessment of the psychometric properties.	Not Academy based
Sniras, S. & Uspuriene, A.	2019	Attitude of young basketball players and their coaches towards the importance of abilities that are necessary for a coach	Not Academy based
Thomas et al.	2019	Types, sources, and debilitating factors of sport confidence in elite early adolescent academy soccer players.	Not Academy based
Cupples et al.	2020	Assessing the Ecological-Context Strengths of School-Based Talent Development Programs in Rugby League	Not Academy based
Lima et al.	2020	Deliberate Practice, Functional Performance and Psychological Characteristics in Young Basketball Players: A Bayesian Multilevel Analysis	Not Academy based
Meyers, M. & Stewart, C.	2020	Mood States of Olympic Developmental Male Soccer Athletes: Role of Science in Talent Identification	Not Academy based
Nasiruddin et al.	2020	The motivation of football players: The impact of coach leadership style in malaysian sports schools	Not Academy based
O'Connor et al.	2020	Positive youth development and gender differences in high performance sport	Not Academy based
Lopez de Subijana et al.	2021	Adolescent athletes' perceptions of both their coachs' leadership and their personal motivation	Not Academy based
Lemoyne et al.	2022	Talent Identification in Elite Adolescent Ice Hockey Players: The Discriminant Capacity of Fitness Tests, Skating Performance and Psychological Characteristics	Not Academy based
Lourenco et al.	2022	Predicting perceived sport performance via self-determination theory	Not Academy based
Owen et al.	2022	Psychosocial and Physiological Factors Affecting Selection to Regional Age-Grade Rugby Union Squads: A Machine Learning Approach	Not Academy based
Steger et al.	2022	Exploring the Relationship Between Athletic Identity on Certain Coping Mechanisms in Adolescent Athletes	Not Academy based
Tušak et al.	2022	Dynamic Interactive Model of Sport Motivation	Not Academy based
Zuber, C.	2023	Construction and validation of the German coach-rating scale to assess achievement-motivated behavior in team sports (AMBIS	Not Academy based
Forsman et al.	2016	Identifying technical, physiological, tactical and psychological characteristics that contribute to career progression in soccer	Not Academy based
Forsman et al.	2016	Development of perceived competence, tactical skills, motivation, technical skills, and speed and agility in young soccer players	Not Academy based
Goncalves et al.	2011	Why do they engage in such hard programs? The search for excellence in youth basketball	Not Academy based
Meyers et al.	2008	Coping skills of olympic developmental soccer athletes	Not Academy based
Van Den Berg, et al.	2019	Psychological factors may counterbalance physical disadvantage of late maturation among African junior soccer players	Not Academy based
Van Den Berg, et al.	2012	The role of biological maturity in sport psychological skills of young rugby players: An explorative investigation	Not Academy based
Zuber, C. & Conzelmann, A.	2019	Motivational Patterns as an Instrument for Predicting Performance Not Only in Football? A Replication Study With Young Talented Ice Hockey Players	Not Academy based
Sigmundsson et al.	2020	Passion, grit and mindset in football players	Not Academy based
Carvalho et al.	2018	Growth, functional capacities and motivation for achievement and competitiveness in youth basketball: an interdisciplinary approach	Not Academy based
Freire et al.	2023	Are the athletes' perceptions of the coach's autonomy support, age and practice time associated with the development of life skills among young athletes?	Not Academy based
Ramis et al.	2023	Perfectionistic Environments and Irrational Beliefs on the Transition to Elite Athletic Performance: A Longitudinal Study	Not Academy based
Söderström, T. & Garn, A. C.	2023	Sport specialization in Swedish football players: Investigating a model of antecedents and outcomes	Not Academy based
Verner-Filion, J. & Gaudreau, P.	2023	Need satisfaction and Sport motivation predict selection in a competitive Youth Soccer Team over and above the relative age effect	Not Academy based
Roy, M. & Savard, C.	2002	Implementation of a goal setting strategy with a football team	Not available in English	9
Beniscelli, V. & Álvarez, M.	2010	Percieved effort components in youth soccer	Not available in English
Castillo et al.	2011	Motivational climate, approach-avoidance achievement goals and well-being in young soccer players	Not available in English
Seiler, R.	2011	Psychological demands in adolescent competitive sport - Causes, risks and options for action	Not available in English
Amaral, M. & Cruz, J.	2013	Natureza da percepção de ameaça e preditores das estratégias de regulação emocional na competição desportiva: Um estudo com atletas talentosos de Futebol. / Nature of threat perception and predictors of emotion regulation strategies in competitive sport: A study of talented soccer players	Not available in English
Ganiev et al.	2015	Structure and content of initial prevocational training program for junior basketball players	Not available in English
Menegassi et al.	2018	Proposal of multidimensional performance rating of young soccer players	Not available in English
Lorenzon et al.	2023	Psychological distress related to psychological skills associated with sports performance in young athletes	Not available in English
Çınargür, H. & Erturan, G.	2023	ALTYAPI FUTBOL OYUNCULARININ MEVKİLERİNE GÖRE PROBLEM ÇÖZME, DİKKAT VE MOTİVASYON DÜZEYLERİNİN İNCELENMESİ	Not available in English
Hall, H. & Kerr, A.	1997	Motivational antecedents of precompetitive anxiety in youth sport	Not team-based sport	16
Harwood et al.	2004	Motivational Profiles and Psychological Skills Use within Elite Youth Sport	Not team-based sport
Parker, J. & Lovell, G.	2009	Characteristics affecting the use of imagery: A youth sports academy study	Not team-based sport
Brand, et al.	2010	High exercise levels are related to favorable sleep patterns and psychological functioning in adolescents: A comparison of athletes and controls	Not team-based sport
Arthur et al.	2011	The role of athlete narcissism in moderating the relationship between coaches' transformational leader behaviors and athlete motivation	Not team-based sport
Wang et al.	2011	Impact of the talent development environment on achievement goals and life aspirations in Singapore	Not team-based sport
Parker, J. & Lovell, G.	2012	Age differences in the vividness of youth sport performers' imagery ability	Not team-based sport
Verkooijen et al.	2012	Athletic identity and well-being among young talented athletes who live at a Dutch elite sport center	Not team-based sport
Nicholls et al.,	2013	Dispositional coping, coping effectiveness, and cognitive social maturity among adolescent athletes	Not team-based sport
Wikman	2014	Effects of goal setting on fear of failure in young elite athletes	Not team-based sport
Elferink-Gemser et al.	2015	The Importance of psychological constructs for training volume and performance improvement. A structural equation model for youth speed skaters	Not team-based sport
Suppiah et al.	2016	Restricted and unrestricted sleep schedules of Asian adolescent, high-level student athletes: Effects on sleep durations, marksmanship and cognitive performance	Not team-based sport
Brazo-Sayavera et al.	2017	Spanish version of the Talent Development Environment Questionnaire for sport: Cultural adaptation and initial validation	Not team-based sport
Li et al.	2017	Impacts of talent development environments on athlete burnout: a self-determination perspective	Not team-based sport
Hauser et al.	2024	Links between environmental features and developmental outcomes of elite youth athletes: A cross-sectional study within the German talent pathway	Not team-based sport
Morbee et al.	2023	Identifying profiles of parental (de)motivating behaviors in youth sports: A multi-informant approach	Not team-based sport
Morris, T.	2000	Psychological characteristics and talent identification in soccer	Review	20
Reilly, T. & Gilbourne, D.	2003	Science and football: A review of applied research in the football codes	Review
Smith, D.	2003	A Framework for Understanding the Training Process Leading to Elite Performance	Review
Abbott, A. & Collins, D.	2004	Eliminating the dichotomy between theory and practice in talent identification and development: Considering the role of psychology	Review
Abbott et al.	2005	Unnatural selection: Talent identification and development in sport	Review
Ericsson et al.	2009	Toward a science of exceptional achievement: Attaining superior performance through deliberate practice	Review
Burgess, D. & Naughton, G.	2010	Talent development in adolescent team sports: a review	Review
Malina, R.	2010	Early sport specialization: Roots, effectiveness, risks	Review
Naughton, G. & Hartwig, T.	2012	Injury prevention in junior sport: Time for new priorities	Review
Fernández-Río, J. & Méndez-Giménez, A.	2014	Talent detection and development in soccer. A review	Review
Vaczi, M.	2015	Soccer, culture and society in Spain: An ethnography of Basque fandom	Review
Macnamara et al.	2016	The Relationship Between Deliberate Practice and Performance in Sports: A Meta-Analysis	Review
Den Hartigh, et al.	2017	Embedding the psychosocial biographies of Olympic medalists in a (meta-)theoretical model of dynamic networks	Review
Elferink-Gemser, M. & Hettinga, F.	2017	Pacing and Self-regulation: Important Skills for Talent Development in Endurance Sports	Review
Gledhill et al.,	2017	Psychosocial factors associated with talent development in football: A systematic review	Review
Machado, R.	2017	Mental toughness on soccer. A systematic review	Review
Wilson, J.	2017	Talent identification and development of youth athletes in football	Review
Murr et al.	2018	Psychological talent predictors in youth soccer: A systematic review of the prognostic relevance of psychomotor, perceptual-cognitive and personality-related factors	Review
Sarmento et al.	2018	Talent Identification and Development in Male Football: A Systematic Review	Review
Grushkoa et al.	2019	Modern trends of sport psychology in Russian psychological society	Review
Holt et al.	2002	Toward a grounded theory of the psychosocial competencies involved in becoming a professional soccer player	Wrong study design	31
Partridge, J.	2003	Effects of peer influence on psychosocial outcomes in the sport context	Wrong study design
Richardson, D.	2003	An exploration of the role of heads of education and welfare within the football association premier league academy structure: an action research approach to understanding role evolvement and practice	Wrong study design
Littlewood, M.	2005	The impact of foreign player acquisition on the development and progression of young players in elite level english professional football	Wrong study design
Morgan, G	2006	Coaching behaviours and players' motivation in elite youth football	Wrong study design
Smith, S. & Block, M.	2010	Talent selection in youth baseball: Factors that predict end of season success	Wrong study design
Bolter, N	2011	Coaching for character: Mechanisms of influence on adolescent athletes' sportsmanship	Wrong study design
Hill, C.	2012	The identification and development of training behaviours in professional rugby players	Wrong study design
Platts, C	2012	Education and welfare in professional football academies and centres of excellence: a sociological study	Wrong study design
Barney, E.	2015	Preliminary stages in the validation of a talent identification model in cricket	Wrong study design
Elumaro, A.	2015	Understanding the nature of talent identification and development in the nigerian context	Wrong study design
Nichols, E.	2017	The influence of affect regulation on paradoxical performance effects or choking in sports	Wrong study design
Cuthbert et al.	2018	Elite youth gaelic footballers and their holistic development: the academy experience	Wrong study design
Kelly, A.	2018	A multidisciplinary investigation into the talent identification and development process in an english football academy	Wrong study design
Barker et al.	2011	Reflections on consulting in elite youth male English cricket and soccer academies	Wrong study design
Babu, J., & Nimkar, N.	2020	Study on talent identification of soccer for young Indian male players	Wrong study design
Rothwell et al.	2020	Exploring British adolescent rugby league players' experiences of professional academies and dropout	Wrong study design
De Biasi, A	2021	The interplay of talent and discipline: A study of the experience of elite Italian volleyball players	Wrong study design
Ribeiro et al.	2021	Talent Development in Sport Requires Athlete Enrichment: Contemporary Insights from a Nonlinear Pedagogy and the Athletic Skills Model	Wrong study design
Tang, Y., & Gu, Y.	2010	Ordinary middle schools in china high-level men's football team's investigation andanalysis	Wrong study design
Thomas et al.	2021	Types, Sources, and Debilitating Factors of Sport Confidence in Elite Early Adolescent Academy Soccer Players	Wrong study design
Vaughan et al.	2022	Social and Cultural Constraints on Football Player Development in Stockholm: Influencing Skill, Learning, and Wellbeing	Wrong study design
Ade, R.	2023	Perceptions and experiences of organisational stress within elite football academy environments	Wrong study design
Crawley, N. & Hills, L.	2023	Mind the gap: Environmental influences on player psychosocial needs and development in an elite youth football academy	Wrong study design
Mills et al.	2023	Introducing an integrated model of talent development: From research to practice	Wrong study design
Williams, A. & Reilly, T.	2000	Editorial: Searching for the stars	Wrong study design
Kokovié, D	2011	Development of young players: social and anthropological dimensions - example of basketball	Wrong study design
Collins, D. & MacNamara, A.	2012	The rocky road to the top: why talent needs trauma	Wrong study design
Brenner et al.	2016	Sports Specialization and Intensive Training in Young Athletes	Wrong study design
Mann et al.	2017	Searching for the elusive gift: advances in talent identification in sport	Wrong study design
Geisler, P.	2019	The Complex Nature of Sports Specialization: It Can and Should Be Personal	Wrong study design
				343	Total
				307	Total (excluding, No full text - reports not retrieved)
